# Supplementary material for: Interaction of phytate with cyclic polyamines
Source: Royal Society of Chemistry journal article supplement (doi:10.1039/d3nj04652d), 2023-11-24
Supplement: d3nj04652d9.pdf [file d3nj04652d9.pdf]

## Interaction of phytate with cyclic polyamines

### Supplementary material

Julia Torres,<sup>a\*</sup> Nicolás Veiga,<sup>a</sup> Matteo Savastano,<sup>b</sup> Carlos Kremer,<sup>a</sup> Antonio Bianchi<sup>c</sup>

<sup>a</sup>*Área Química Inorgánica, Departamento Estrella Campos, Facultad de Química, Universidad de la República, Gral. Flores 2124, Montevideo, Uruguay.*

<sup>b</sup>*Department of Human Sciences and Quality of Life Promotion, University San Raffaele Roma, Via di Val Cannuta 247, 00166 Rome, Italy*

<sup>c</sup>*Department of Chemistry "Ugo Schiff", University of Florence, Sesto Fiorentino, Italy.*

*\*Corresponding author*

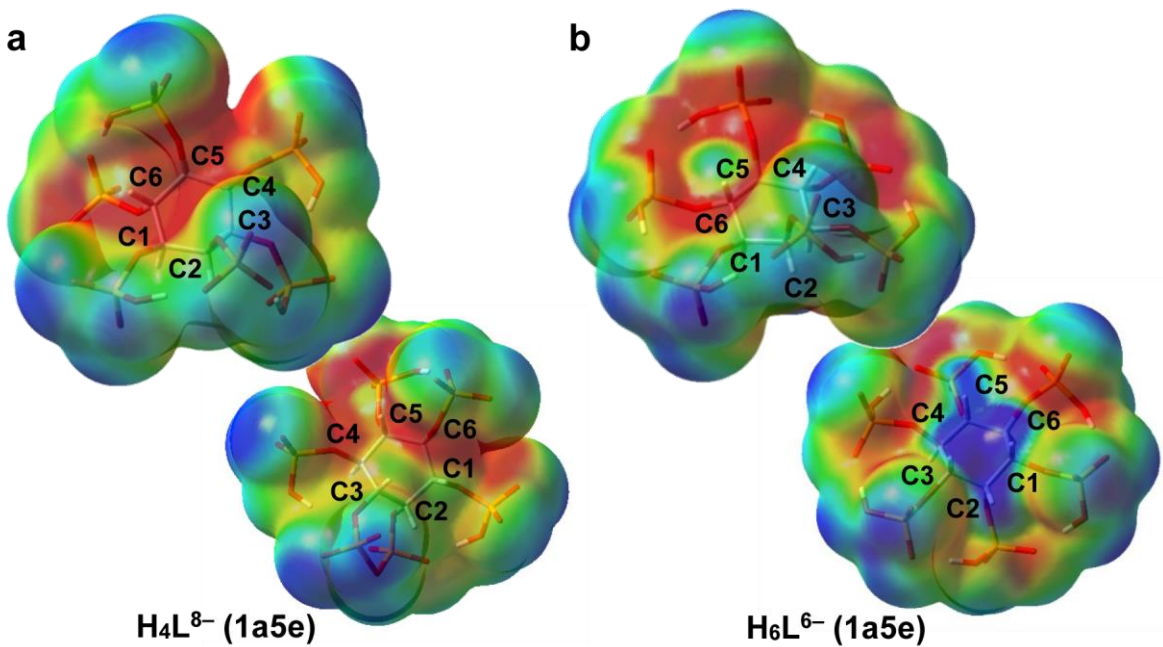

Figure S1. RHF/3-21+G\* geometries for the 1a5e conformer of two  $\text{InsP}_6$  species:  $\text{H}_4\text{L}^{8-}$  (a) and  $\text{H}_6\text{L}^{6-}$  (b), taken from a previous work.<sup>1</sup> The electrostatic potential is mapped on an isodensity surface (isodensity value = 0.0004 e, scale: -0.75 V (red) to -0.65 V (blue) for a, and -0.56 V (red) to -0.51 V (blue) for b).

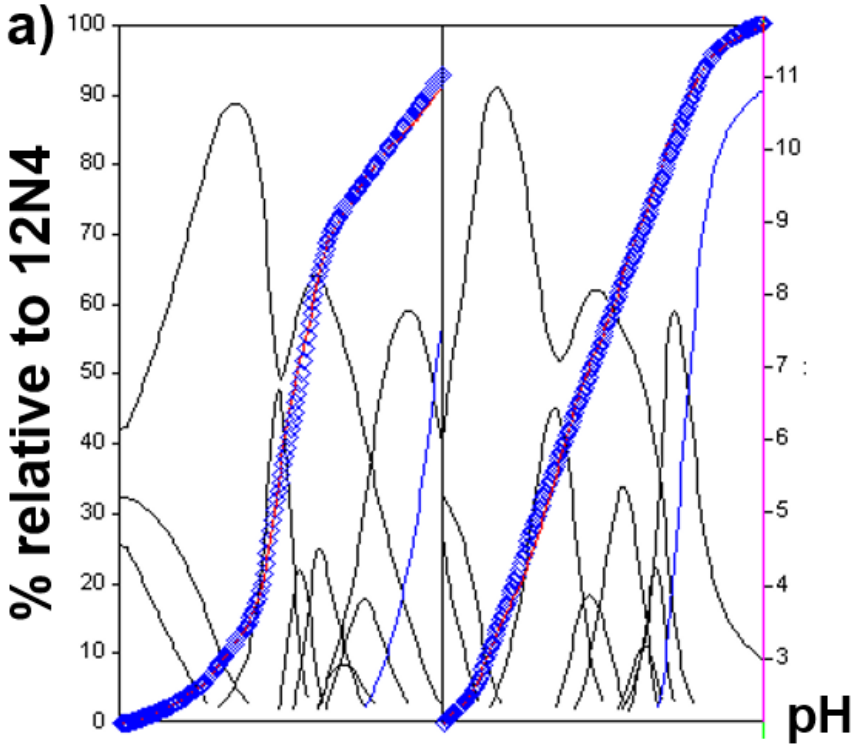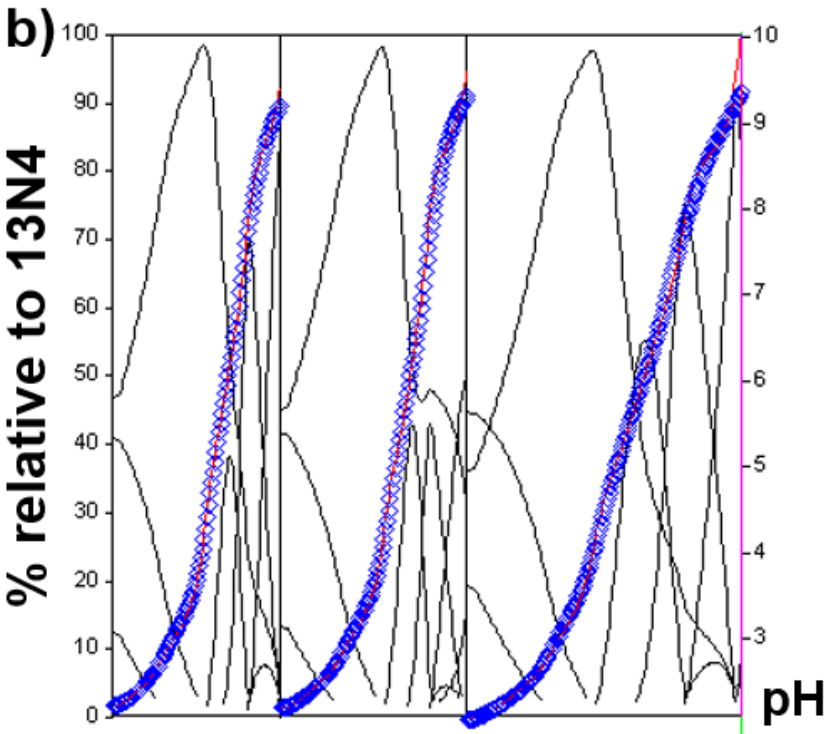

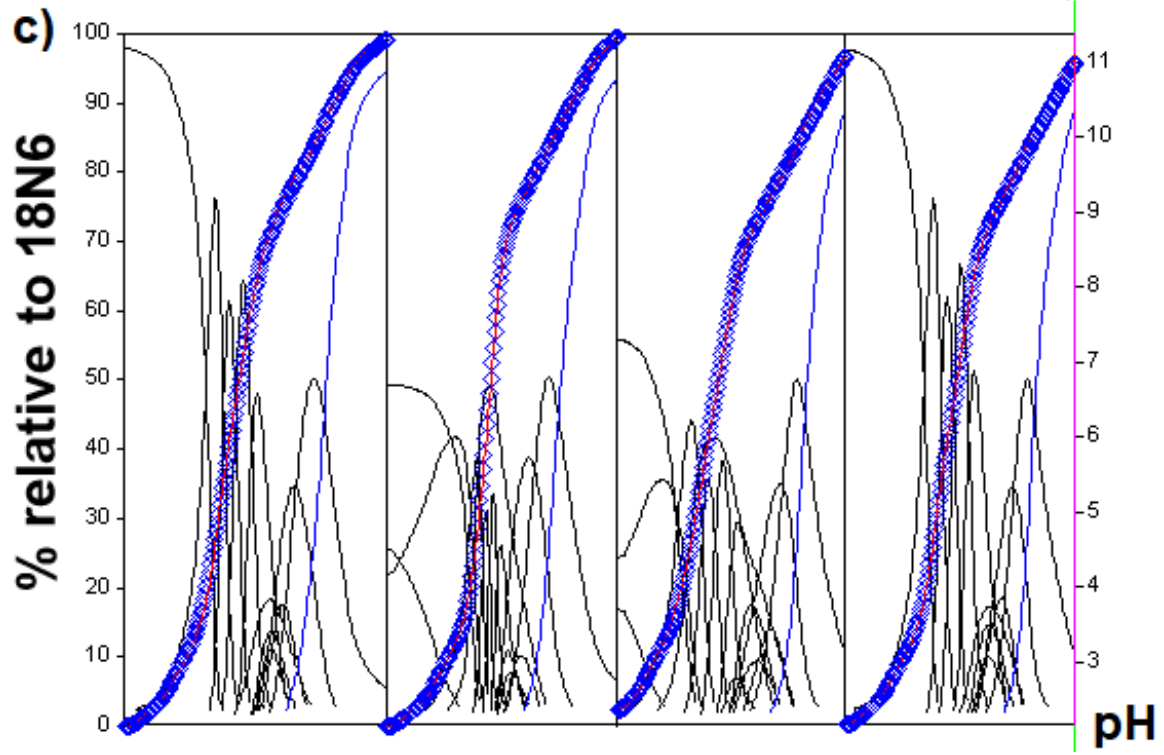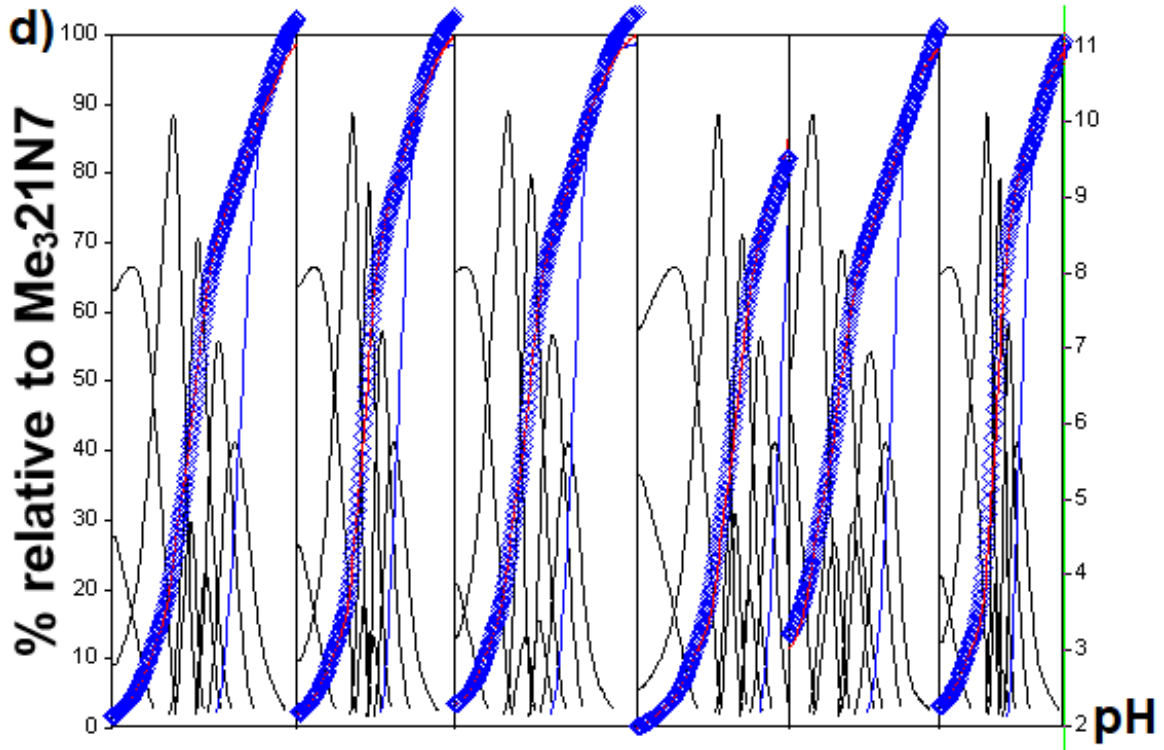

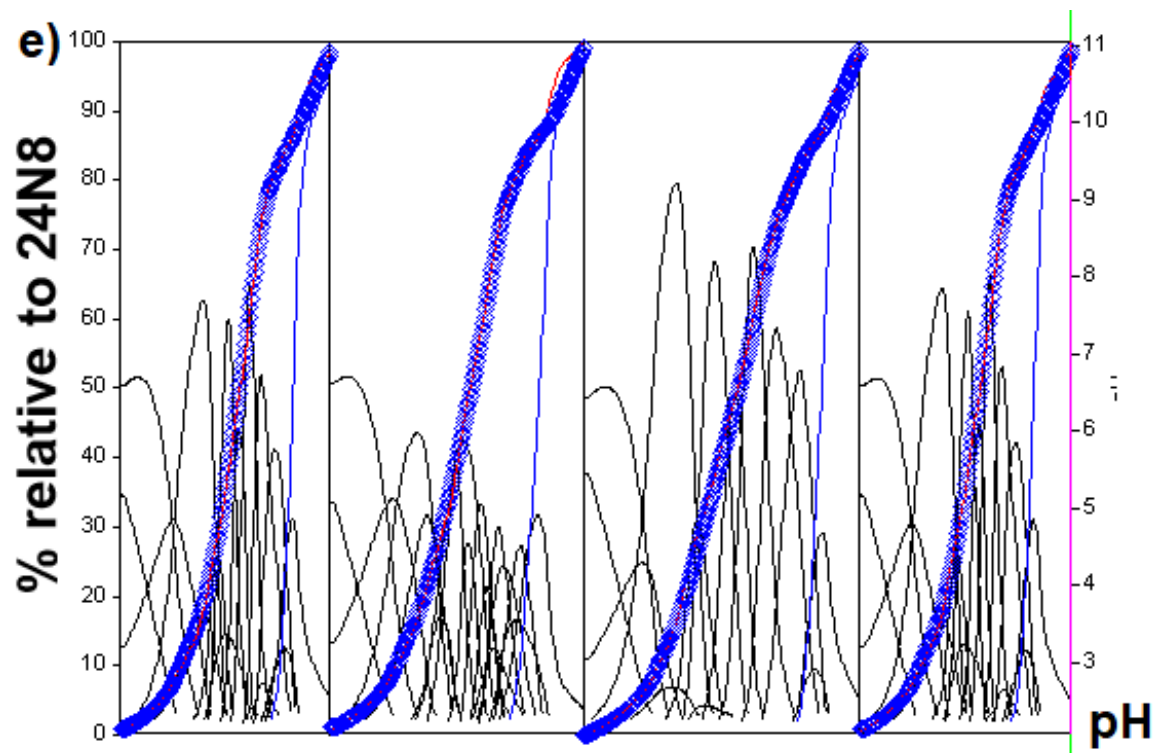

Figure S2- Potentiometric data used for final fit for the  $\text{InsP}_6$ :polyamine systems as shown by Hyperquad software.<sup>2</sup> Calculated expected pH values and formed species are also shown.

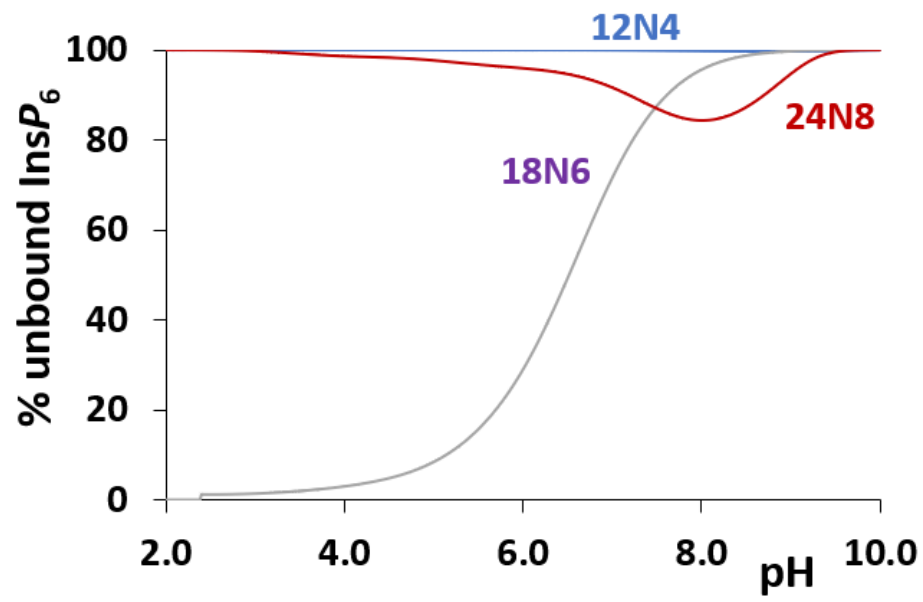

Figure S3. Percentage of unbound  $\text{InsP}_6$  in the presence of cyclic polyamines.  $[\text{InsP}_6]_{\text{total}} = [\text{polyamine}]_{\text{total}} = 1 \mu\text{M}$ , calculated from data in Tables S1 and Table 2 values.

Table S1. Protonation constant values of polyamines and *InsP*<sub>6</sub> at 25.0 °C in 0.15 M NaClO<sub>4</sub> employed for polyamine:*InsP*<sub>6</sub> interaction studies. Stepwise protonation constants are calculated in b) from overall protonation constants shown in a).

| a) Overall protonation constants  |           |               |               |               |               |               |               |               |                           |
|-----------------------------------|-----------|---------------|---------------|---------------|---------------|---------------|---------------|---------------|---------------------------|
|                                   | $K^{H_1}$ | $\beta^{H_2}$ | $\beta^{H_3}$ | $\beta^{H_4}$ | $\beta^{H_5}$ | $\beta^{H_6}$ | $\beta^{H_7}$ | $\beta^{H_8}$ | Details                   |
| <b>12N4</b>                       | 10.71(3)  | 20.41(4)      | 22.4(1)       | 24.4(2)       |               |               |               |               | This work, $\sigma = 1.6$ |
| <b>13N4</b>                       | 11.02(5)  | 20.84(5)      | 23.0(1)       | 24.7(3)       |               |               |               |               | This work, $\sigma = 1.2$ |
| <b>18N6</b>                       | 10.15     | 19.63         | 28.52         | 32.79         | 35.00         | 36.0          |               |               | Taken from <sup>3</sup>   |
| <b>Me<sub>3</sub>21N7</b>         | 9.27      | 18.22         | 26.19         | 31.61         | 34.59         | 36.37         |               |               | Taken from <sup>4</sup>   |
| <b>24N8</b>                       | 9.65      | 18.98         | 27.74         | 35.61         | 40.16         | 43.58         | 46.29         | 48.24         | Taken from <sup>5</sup>   |
| <b><i>InsP</i><sub>6</sub></b>    | 10.43(2)  | 19.55(4)      | 29.33(2)      | 38.37(3)      | 46.18(4)      | 52.35(5)      | 57.39(6)      | 60.08(8)      | This work, $\sigma = 0.7$ |
| b) Stepwise protonation constants |           |               |               |               |               |               |               |               |                           |
|                                   | $K^{H_1}$ | $K^{H_2}$     | $K^{H_3}$     | $K^{H_4}$     | $K^{H_5}$     | $K^{H_6}$     | $K^{H_7}$     | $K^{H_8}$     | Details                   |
| <b>12N4</b>                       | 10.73     | 9.69          | 2.0           | 2.0           |               |               |               |               | Calculated                |
| <b>13N4</b>                       | 11.02     | 9.82          | 2.2           | 1.7           |               |               |               |               | Calculated                |
| <b>18N6</b>                       | 10.15     | 9.48          | 8.89          | 4.27          | 2.21          | 1.0           |               |               | Calculated                |
| <b>Me<sub>3</sub>21N7</b>         | 9.27      | 8.95          | 7.97          | 5.42          | 2.99          | 1.78          |               |               | Calculated                |
| <b>24N8</b>                       | 9.65      | 9.33          | 8.76          | 7.87          | 4.55          | 3.42          | 2.71          | 1.95          | Calculated                |
| <b><i>InsP</i><sub>6</sub></b>    | 10.43     | 9.12          | 9.78          | 9.04          | 7.81          | 6.17          | 5.04          | 2.69          | Calculated                |

Table S2. Effective formation constants for 1:1 adduct formation of polyamines and  $\text{InsP}_6$  at 25.0 °C in 0.15 M  $\text{NaClO}_4$ . Protons are associated either to the polyamine (A) or  $\text{InsP}_6$  (L) considering the relative basicity of the interacting species.  $\xi$  is the product of the charges of the interacting species.<sup>6</sup>

| Polyamine      | Equilibrium                                                                                                             | $\log K$ | $\log K/\xi$ |
|----------------|-------------------------------------------------------------------------------------------------------------------------|----------|--------------|
| <b>12N4</b>    | $\text{H}_2\text{A}^{2+} + \text{H}_2\text{L}^{10-} \rightleftharpoons [(\text{H}_2\text{A})(\text{H}_2\text{L})]^{8-}$ | 3.99     | 0.20         |
|                | $\text{H}_2\text{A}^{2+} + \text{H}_3\text{L}^{9-} \rightleftharpoons [(\text{H}_2\text{A})(\text{H}_3\text{L})]^{7-}$  | 3.26     | 0.18         |
|                | $\text{H}_2\text{A}^{2+} + \text{H}_4\text{L}^{8-} \rightleftharpoons [(\text{H}_2\text{A})(\text{H}_4\text{L})]^{6-}$  | 3.45     | 0.22         |
| <b>13N4</b>    | $\text{H}_2\text{A}^{2+} + \text{H}_2\text{L}^{10-} \rightleftharpoons [(\text{H}_2\text{A})(\text{H}_2\text{L})]^{8-}$ | 6.00     | 0.30         |
|                | $\text{H}_2\text{A}^{2+} + \text{H}_3\text{L}^{9-} \rightleftharpoons [(\text{H}_2\text{A})(\text{H}_3\text{L})]^{7-}$  | 4.46     | 0.25         |
|                | $\text{H}_2\text{A}^{2+} + \text{H}_4\text{L}^{8-} \rightleftharpoons [(\text{H}_2\text{A})(\text{H}_4\text{L})]^{6-}$  | 4.51     | 0.28         |
| <b>18N6</b>    | $\text{H}_2\text{A}^{2+} + \text{H}_4\text{L}^{8-} \rightleftharpoons [(\text{H}_2\text{A})(\text{H}_4\text{L})]^{6-}$  | 3.70     | 0.23         |
|                | $\text{H}_3\text{A}^{3+} + \text{H}_4\text{L}^{8-} \rightleftharpoons [(\text{H}_3\text{A})(\text{H}_4\text{L})]^{5-}$  | 3.71     | 0.15         |
|                | $\text{H}_3\text{A}^{3+} + \text{H}_5\text{L}^{7-} \rightleftharpoons [(\text{H}_3\text{A})(\text{H}_5\text{L})]^{4-}$  | 4.94     | 0.24         |
|                | $\text{H}_3\text{A}^{3+} + \text{H}_6\text{L}^{6-} \rightleftharpoons [(\text{H}_3\text{A})(\text{H}_6\text{L})]^{3-}$  | 6.53     | 0.36         |
|                | $\text{H}_3\text{A}^{3+} + \text{H}_7\text{L}^{5-} \rightleftharpoons [(\text{H}_3\text{A})(\text{H}_7\text{L})]^{2-}$  | 7.96     | 0.38         |
|                | $\text{H}_4\text{A}^{4+} + \text{H}_7\text{L}^{5-} \rightleftharpoons [(\text{H}_4\text{A})(\text{H}_7\text{L})]^{-}$   | 9.12     | 0.46         |
|                | $\text{H}_4\text{A}^{4+} + \text{H}_8\text{L}^{4-} \rightleftharpoons [(\text{H}_4\text{A})(\text{H}_8\text{L})]$       | 10.23    | 0.64         |
| <b>Me321N7</b> | $\text{H}_3\text{A}^{3+} + \text{H}_6\text{L}^{6-} \rightleftharpoons [(\text{H}_3\text{A})(\text{H}_6\text{L})]^{3-}$  | 1.82     | 0.10         |
| <b>24N8</b>    | $\text{H}_2\text{A}^{2+} + \text{H}_4\text{L}^{8-} \rightleftharpoons [(\text{H}_2\text{A})(\text{H}_4\text{L})]^{6-}$  | 5.04     | 0.32         |
|                | $\text{H}_3\text{A}^{3+} + \text{H}_4\text{L}^{8-} \rightleftharpoons [(\text{H}_3\text{A})(\text{H}_4\text{L})]^{5-}$  | 5.44     | 0.23         |
|                | $\text{H}_4\text{A}^{4+} + \text{H}_4\text{L}^{8-} \rightleftharpoons [(\text{H}_4\text{A})(\text{H}_4\text{L})]^{4-}$  | 5.75     | 0.18         |
|                | $\text{H}_4\text{A}^{4+} + \text{H}_5\text{L}^{7-} \rightleftharpoons [(\text{H}_4\text{A})(\text{H}_5\text{L})]^{3-}$  | 4.68     | 0.17         |
|                | $\text{H}_4\text{A}^{4+} + \text{H}_6\text{L}^{6-} \rightleftharpoons [(\text{H}_4\text{A})(\text{H}_6\text{L})]^{2-}$  | 4.63     | 0.19         |
|                | $\text{H}_4\text{A}^{4+} + \text{H}_7\text{L}^{5-} \rightleftharpoons [(\text{H}_4\text{A})(\text{H}_7\text{L})]^{-}$   | 4.22     | 0.21         |
|                | $\text{H}_5\text{A}^{5+} + \text{H}_7\text{L}^{5-} \rightleftharpoons [(\text{H}_5\text{A})(\text{H}_7\text{L})]$       | 4.29     | 0.17         |



## References

- 1 N. Veiga, J. Torres, I. Macho, K. Gómez, G. González and C. Kremer, *Dalton Trans.*, 2014, **43**, 16238–16251.
- 2 P. Gans, A. Sabatini and A. Vacca, *Talanta*, 1996, **43**, 1739–1753.
- 3 A. Bencini, A. Bianchi, M. Micheloni, P. Paoletti, E. Garcia-España and M. A. Niño, *J. Chem. Soc., Dalton Trans.*, 1991, 1171–1174.
- 4 A. Andrés, C. Bazzicalupi, A. Bencini, A. Bianchi, V. Fusi, E. Garcia-España, C. Giorgi, N. Nardi, P. Paoletti, J. A. Ramirez and B. Valtancoli, *J. Chem. Soc., Perkin Trans. 2*, 1994, 2367–2373.
- 5 A. Bencini, A. Bianchi, P. Dapporto, E. Garcia-Espana, M. Micheloni and P. Paoletti, *Inorg. Chem.*, 1989, **28**, 1188–1191.
- 6 C. De Stefano, O. Giuffrè, D. Milea, C. Rigano and S. Sammartano, *Chemical Speciation & Bioavailability*, 2003, **15**, 29–36.
